# Supplementary material for: Mercury-sensitive water channels as possible sensors of water potentials in pollen
Source: PubMed Central journal article supplement (PMC3830494; doi:10.1093/jxb/ert311), 2013-10-05
Supplement: supp_ert311_jexbot104281_file001.pdf [file supp_ert311_jexbot104281_file001.pdf]

Figure S1

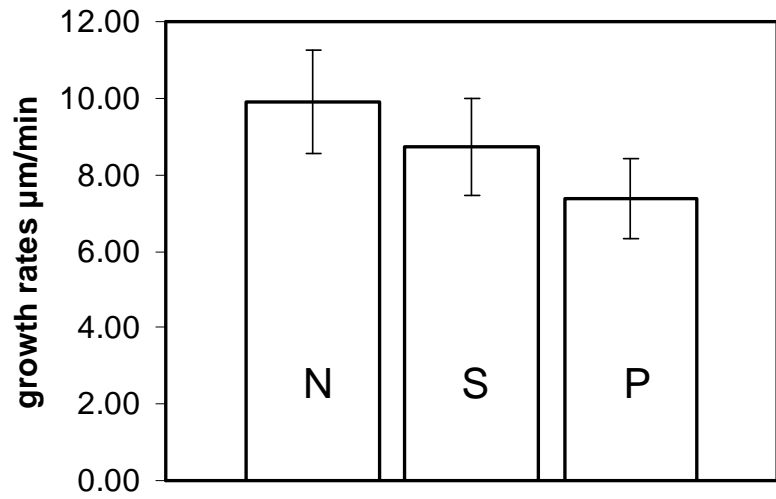

A

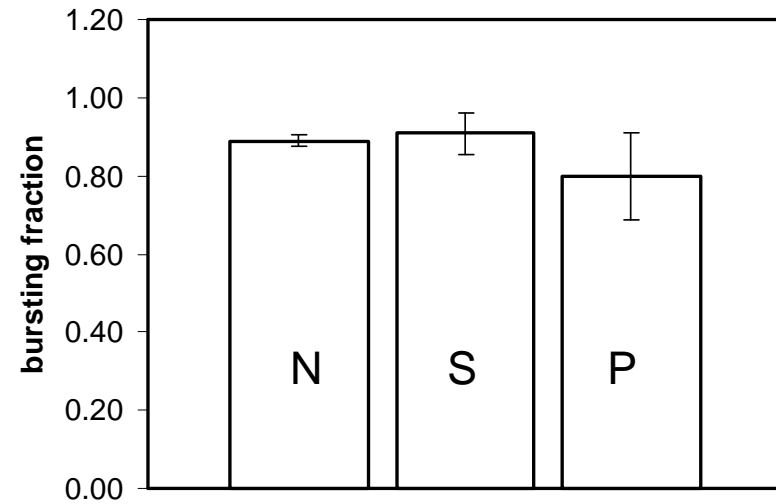

B

Growth and bursting of pollen germinated and grown on media without K ions.

**A.** Linear growth rates. **B.** Bursting fractions using  $200\mu\text{M}$  Hg. N – normal growth medium; S – without K; P – without K and PEG 400 replacing sucrose (see Materials and methods: Media).

Figure S2

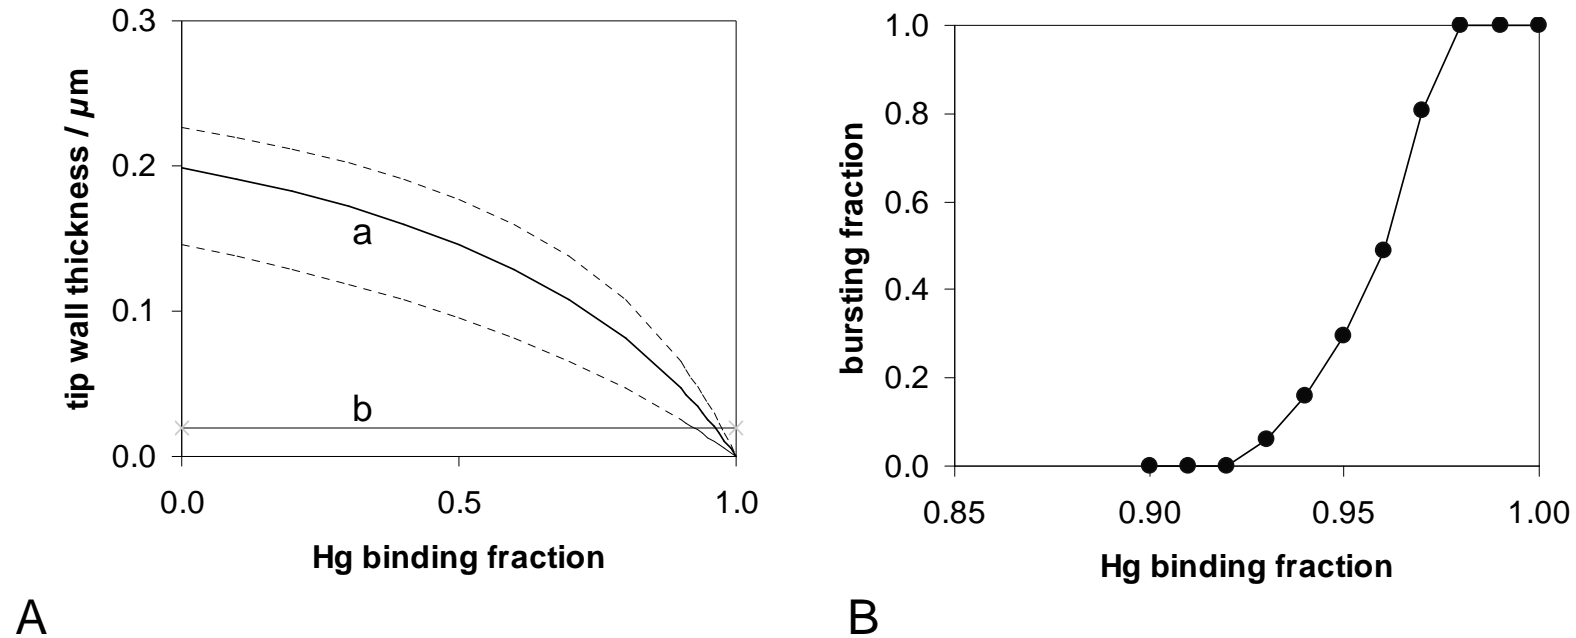

Simulations of bursting for different levels of Hg binding to the sensor molecule (inhibition) using the osmotic model of the lily pollen tube (Hill *et al* 2012 *PLoS ONE* 7, e36585).

**A.** a – thinning curve of the tip cell wall over the range of Hg binding from 0% to 100% using standard lily parameters; the tip thins from 0.2 μm to zero; flanking this curve (dotted lines) are curves with 50% more (upper) or 50% less (lower) sensor in the membrane; b – level set for bursting (the critical thickness) at 0.02 μm. **B.** Fraction of cells that burst, plotted from A. It can be seen that bursting only begins above 90% Hg-binding and the fraction of bursts approaches 100% as the binding increases i.e. there is partial bursting in the tube population over this range.

Figure S3

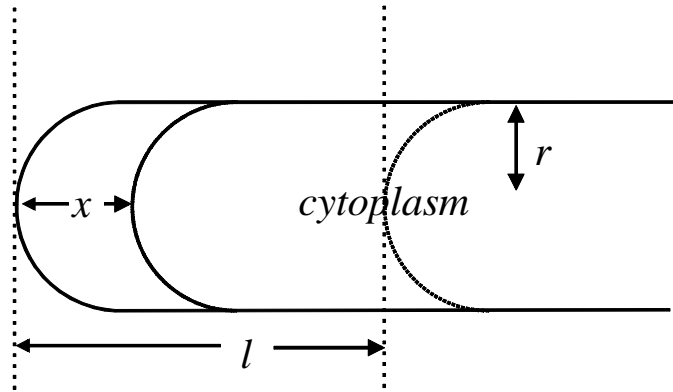

A

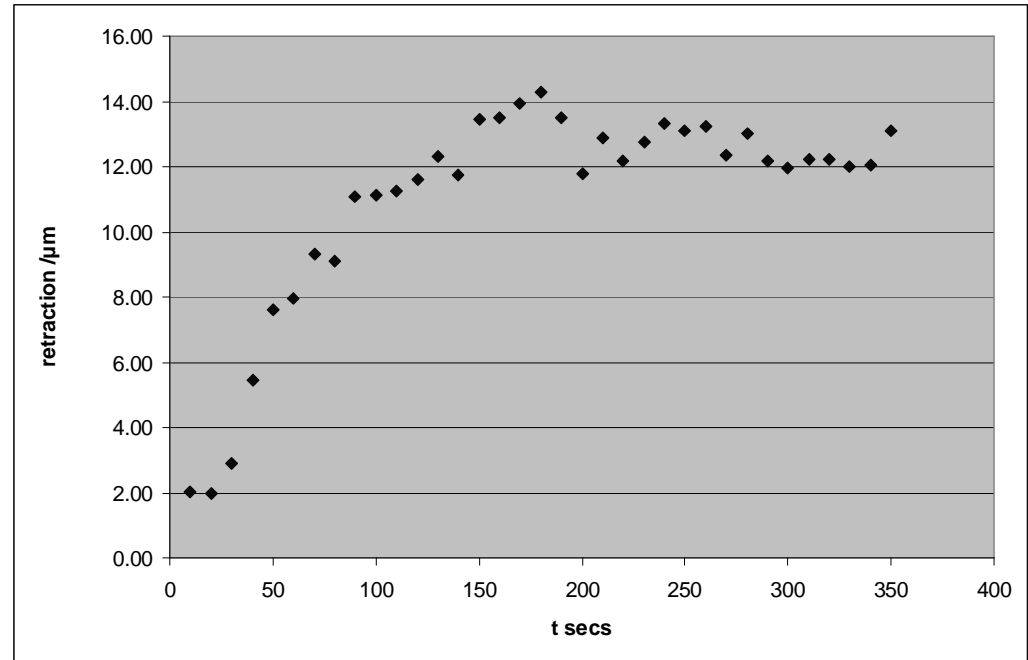

B

Diagram and data of the tip retraction process. **A.** During plasmolysis, which is initially confined to the tip, the retraction of cytoplasm in a tube of radius  $r$  with time proceeds to a plateau at  $x=l$ . **B.** A typical sample of the process.
